# Supplementary material for: A pair of homochiral porous metal–organic frameworks with a helical metal-carboxylate layer
Source: Royal Society of Chemistry journal article supplement (doi:10.1039/c5nj02236c), 2015-12-11
Supplement: c5nj02236c1.pdf [file c5nj02236c1.pdf]

*Electronic Supplementary Information (ESI) for*

**A pair of homochiral porous metal–organic frameworks with helical  
metal-carboxylate layer**

Zhong-Xuan Xu<sup>1, 2</sup>, Liyang Liu<sup>1</sup> and Jian Zhang<sup>1,\*</sup>

*<sup>1</sup>State Key Laboratory of Structural Chemistry, Fujian Institute of Research on the  
Structure of Matter, the Chinese Academy of Sciences, Fuzhou, Fujian 350002, P. R. China.*

*<sup>2</sup>Department of Chemistry, Zunyi Normal College, Zunyi, Guizhou 563002, P. R. China*

*E-mail: zhj@ffirms.ac.cn .*

## Experimental Section

**General information:** All reagents and solvents employed in reactions were purchased from Energy-Chemical and directly used without further purification. The corresponding chiral ligands, (*S*)-H<sub>3</sub>PIA and (*R*)-H<sub>3</sub>PIA, were prepared from L-proline, D-proline and benzene-1,3,5-tricarboxylic acid. Elemental analyses were performed by the analysis center of our institute. To verify the phase purity of **1-D** and **1-L**, the powder X-ray diffraction (XRD) data were collected using a Miniflex(II) diffractometer with Cu-K $\alpha$  radiation ( $\lambda = 1.54056 \text{ \AA}$ ) in a range of 5.00–50.00°. Thermal stability studies of **1-D** and **1-L** were performed on a NETSCHZ STA-449C thermoanalyzer with a heating rate of 10°C/min under an N<sub>2</sub> atmosphere from 30 to 800°C. Luminescence spectra were recorded on a Shimadzu RF-5301 spectrophotometer.

**X-ray single-crystal measurement:** Intensity data collections of complexes **1-D** and **1-L** were performed on a SuperNova Oxford diffractometer with graphite-monochromated Cu K $\alpha$  radiation ( $\lambda = 1.54184 \text{ \AA}$ ) and graphite-monochromated Mo K $\alpha$  radiation ( $\lambda = 0.71073 \text{ \AA}$ ) at room temperature, respectively.

**Measurements of solid CD spectra:** The solid circular dichroism (CD) spectra were measured on a MOS-450 spectropolarimeter using KCl pellets at room temperature.

**Gas adsorption measurement:** A freshly prepared sample of **1-D** was soaked in methanol at 5–10°C for a week to exchange guest molecules. Subsequently, the sample was degassed under dynamic vacuum at 40°C for 10 h to activate the sample. Finally, gas adsorption measurements was carried out on the ASAP (Accelerated Surface Area and Porosimetry) 2020 System.

**Table S1.** Summary of Crystal Data and Refinement Results

| Compound reference                                                                     | <b>1-D</b>                                                                      | <b>1-L</b>                                                                      |
|----------------------------------------------------------------------------------------|---------------------------------------------------------------------------------|---------------------------------------------------------------------------------|
| Chemical formula                                                                       | C <sub>29</sub> H <sub>22</sub> Cd <sub>1.5</sub> N <sub>4</sub> O <sub>7</sub> | C <sub>29</sub> H <sub>22</sub> Cd <sub>1.5</sub> N <sub>4</sub> O <sub>7</sub> |
| Formula Mass                                                                           | 707.10                                                                          | 707.10                                                                          |
| Crystal system                                                                         | Orthorhombic                                                                    | Orthorhombic                                                                    |
| <i>a</i> /Å                                                                            | 15.7377(5)                                                                      | 15.6969(6)                                                                      |
| <i>b</i> /Å                                                                            | 21.1254(8)                                                                      | 20.9233(7)                                                                      |
| <i>c</i> /Å                                                                            | 11.7487(3)                                                                      | 11.7168(4)                                                                      |
| $\alpha$ /°                                                                            | 90                                                                              | 90                                                                              |
| $\beta$ /°                                                                             | 90                                                                              | 90                                                                              |
| $\gamma$ /°                                                                            | 90                                                                              | 90                                                                              |
| Unit cell volume/Å <sup>3</sup>                                                        | 3906.0(2)                                                                       | 3848.2(2)                                                                       |
| Temperature/K                                                                          | 293(2)                                                                          | 293(2)                                                                          |
| Space group                                                                            | <i>P</i> 21212                                                                  | <i>P</i> 21212                                                                  |
| No. of formula units per unit cell, <i>Z</i>                                           | 4                                                                               | 4                                                                               |
| Radiation type                                                                         | CuK $\alpha$                                                                    | MoK $\alpha$                                                                    |
| Absorption coefficient, $\mu$ /mm <sup>-1</sup>                                        | 6.932                                                                           | 0.876                                                                           |
| No. of reflections measured                                                            | 10122                                                                           | 18514                                                                           |
| No. of independent reflections                                                         | 6524                                                                            | 6750                                                                            |
| <i>R</i> <sub>int</sub>                                                                | 0.0358                                                                          | 0.0426                                                                          |
| Final <i>R</i> <sub>I</sub> values ( <i>I</i> > 2 $\sigma$ ( <i>I</i> ))               | 0.0413                                                                          | 0.0387                                                                          |
| Final <i>wR</i> ( <i>F</i> <sup>2</sup> ) values ( <i>I</i> > 2 $\sigma$ ( <i>I</i> )) | 0.1113                                                                          | 0.0993                                                                          |
| Final <i>R</i> <sub>I</sub> values (all data)                                          | 0.0456                                                                          | 0.0427                                                                          |
| Final <i>wR</i> ( <i>F</i> <sup>2</sup> ) values (all data)                            | 0.1143                                                                          | 0.1018                                                                          |
| Goodness of fit on <i>F</i> <sup>2</sup>                                               | 1.043                                                                           | 1.090                                                                           |
| Flack parameter                                                                        | -0.003(8)                                                                       | -0.022(18)                                                                      |
| CCDC number                                                                            | 1420035                                                                         | 1420036                                                                         |

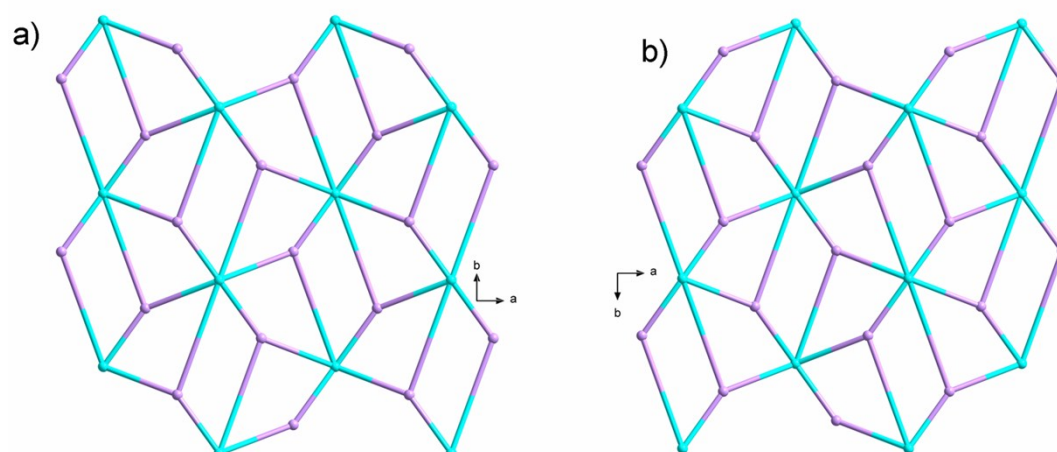

Figure S1. The *kgd* net in **1-D** (a) and **1-L** (b).

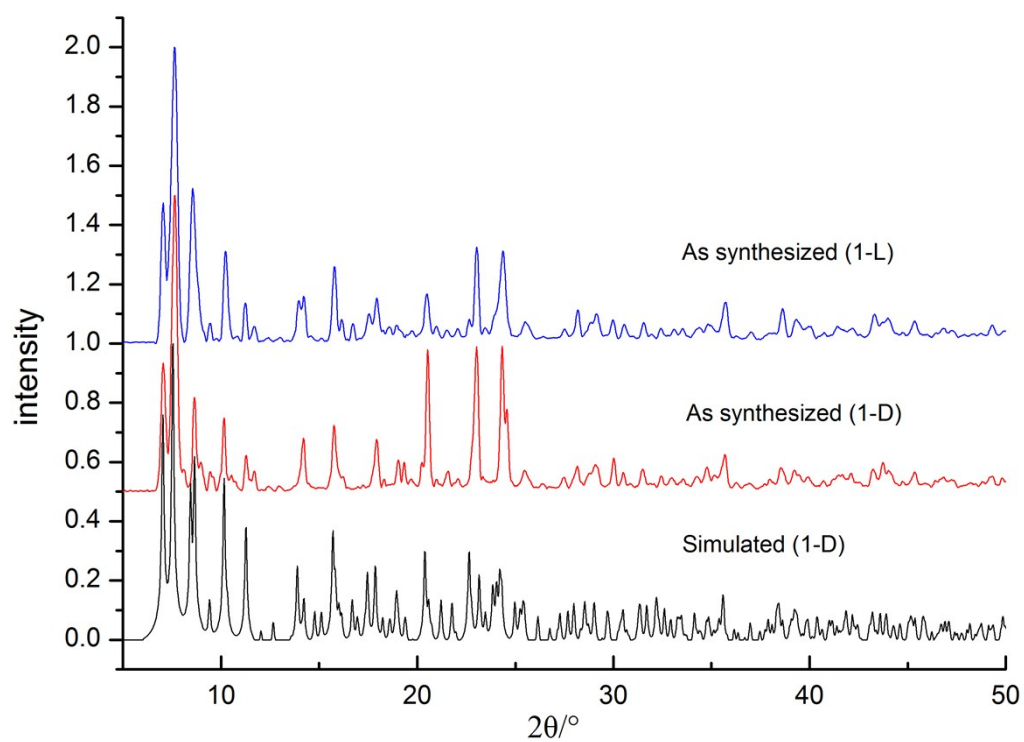

Figure S2. PXRD patterns of **1-D** and **1-L**.

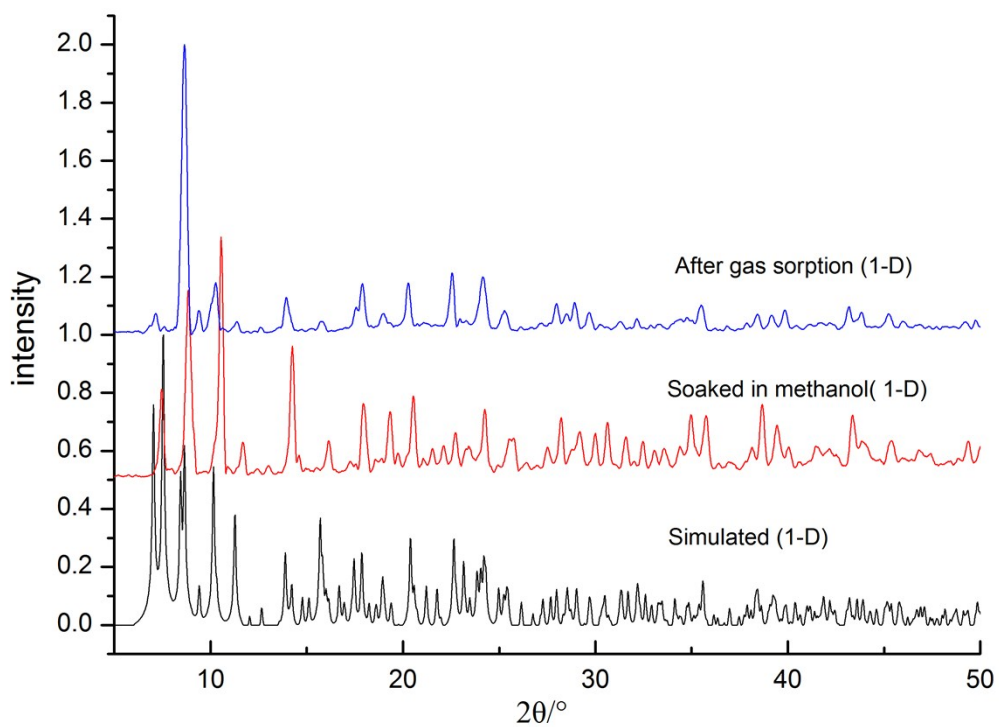

Figure S3. PXRD patterns of **1-D**.

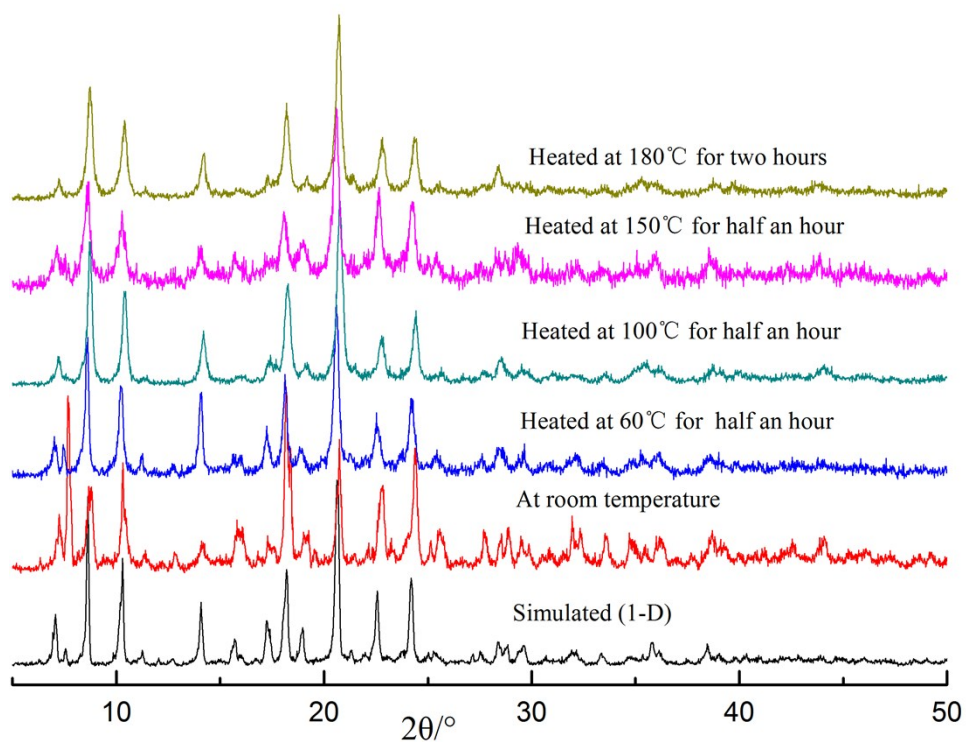

Figure S4. The PXRD patterns of **1-D** at different temperature. The figure shows that the framework of **1-D** is very stable at different temperature.

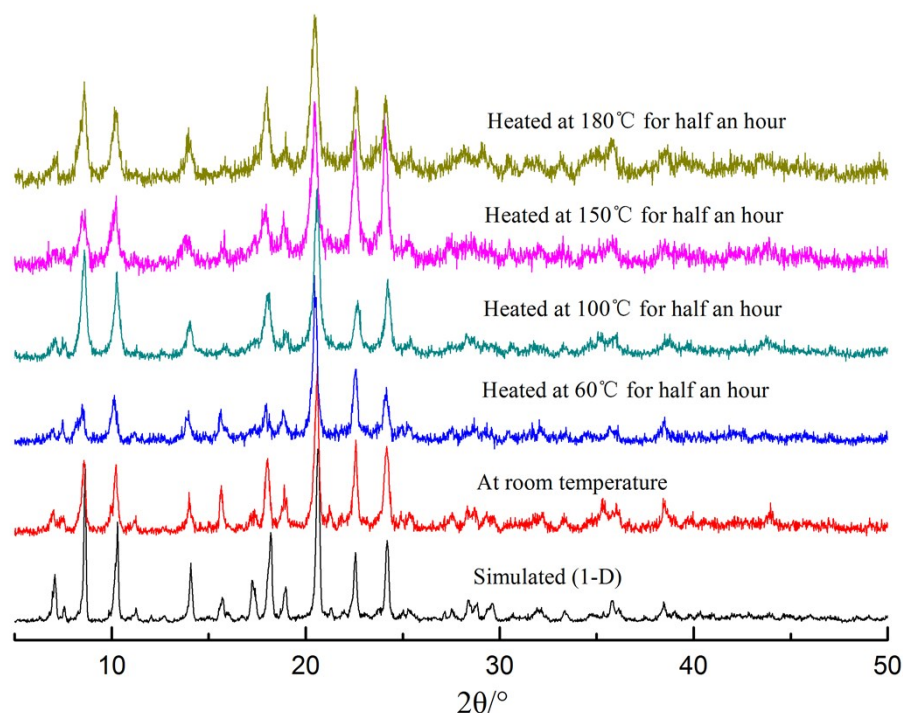

Figure S5. The PXRD patterns of **1-D** at different temperature after soaking in methanol for a week. It shows that the framework of **1-D** is still very stable at different temperature even if some guest molecules have been exchanged by soaking in methanol.

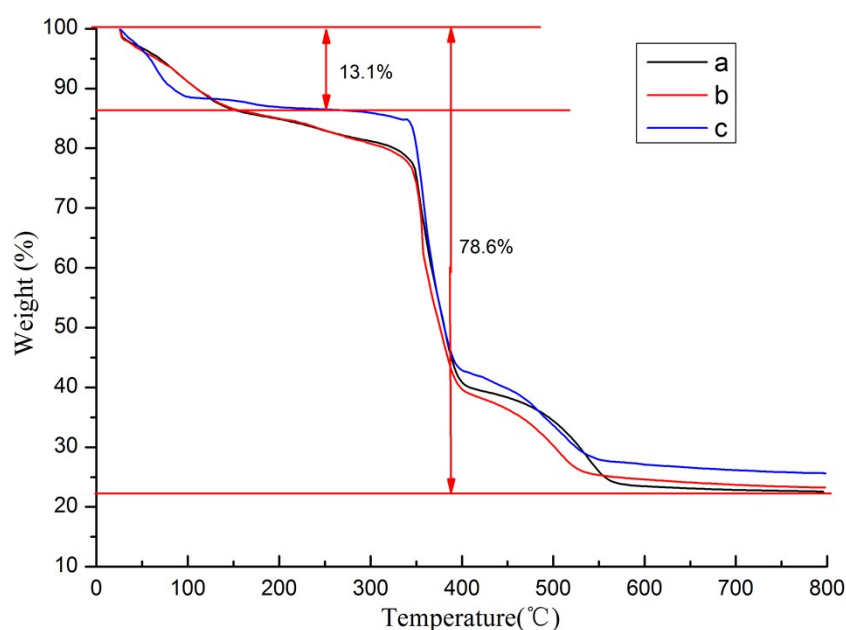

Figure S6. The TGA diagrams of **1-D** (a), the TGA diagrams of **1-L** (b) and the TGA diagrams of **1-D** soaked in methanol (c). The TG curves of **1-D** and **1-L** indicate that the frameworks of these two complexes are stable up to 250 °C. According to the gradual weight losses between 30 and 150 °C, a DMF molecule, a methanol molecule and a water molecule may be released from the frameworks as guest molecules (observed, 13.1%; calculated, 14.8%).

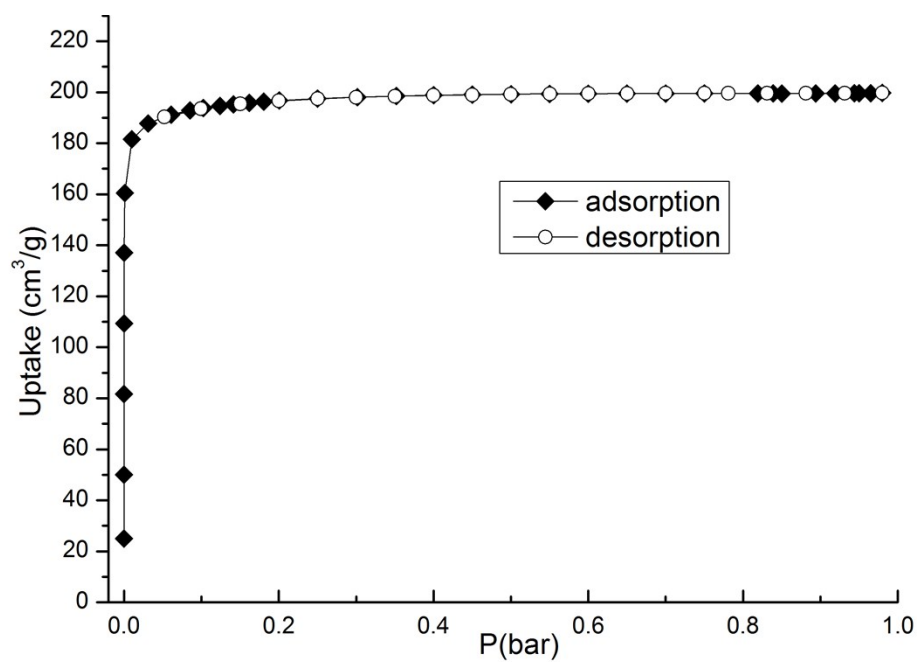

Figure S7. The  $N_2$  sorption isotherms of **1-D** at 77k.

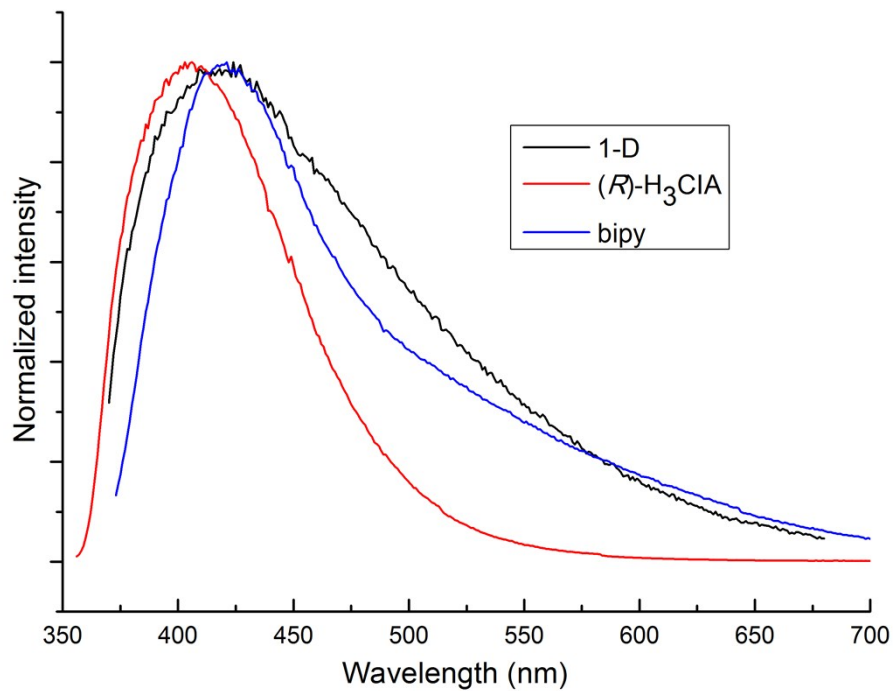

Figure S8. Fluorescent emission spectra of **1-D**, *(R)*-H<sub>3</sub>CIA and bipy.
